# Supplementary material for: 5,6-Membered palladium pincer complexes of 1-thiophosphoryloxy-3-thiophosphorylbenzenes. Synthesis, X-ray structure, and catalytic activity
Source: Royal Society of Chemistry journal article supplement (doi:10.1039/b907644a), 2009-01-01
Supplement: b907644a.pdf [file b907644a.pdf]

### Supplementary data for

## 5,6-Membered Palladium Pincer Complexes of 1-Thiophosphoryloxy-3-Thiophosphorylbenzenes. Synthesis, X-ray structure, and Catalytic activity

*V.A. Kozlov, D.V. Aleksanyan, Yu.V. Nelyubina, K.A. Lyssenko, E.I. Gutsul, A.A. Vasil'ev,  
P.V. Petrovskii, I.L. Odinet*

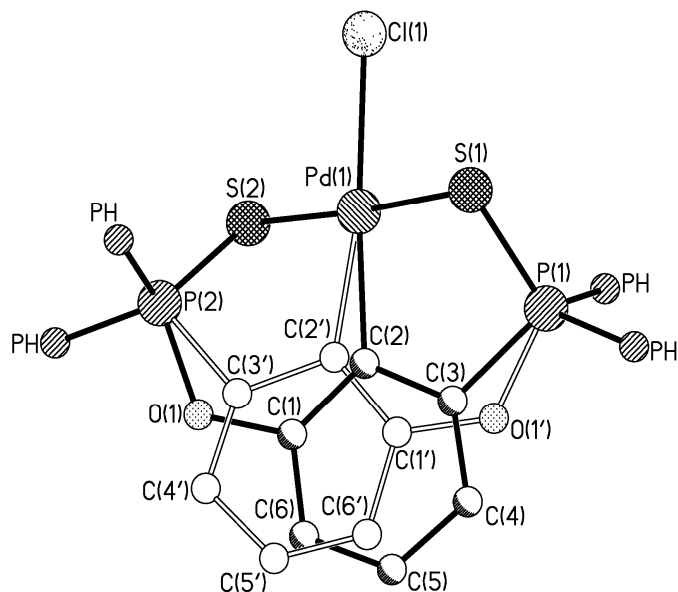

**Figure 1S.** Schematic view of complex **4c** with the central fragment shown as a superposition of two isomers in 70 to 30 ratio. The minor component is indicated by open lines.
